# Supplementary material
Source: Springer Nature journal article supplement (https://www.springermedizin.de/resource/supplementary/12985_2014_2471_MOESM5_ESM.pdf/9606814)

40h p.i.

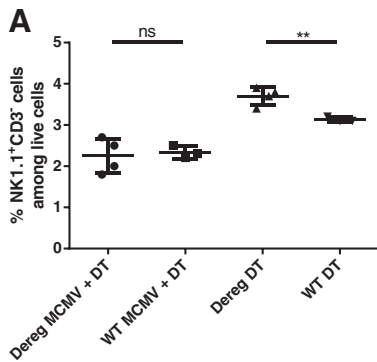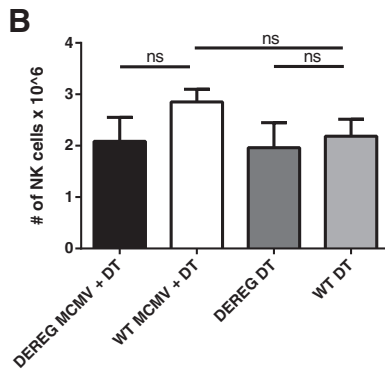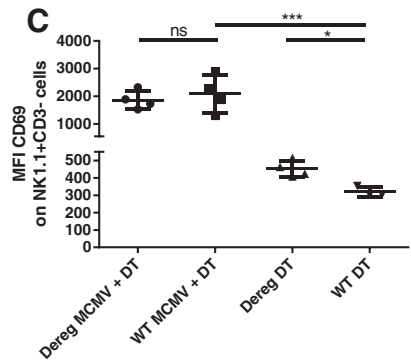

day 3 p.i.

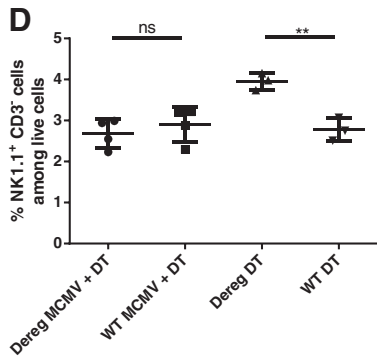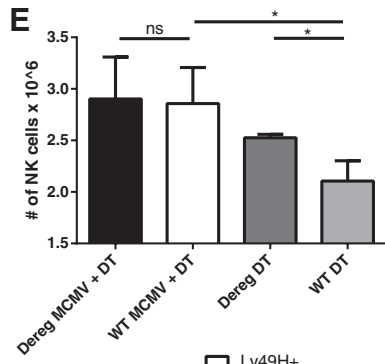

day 7 p.i.

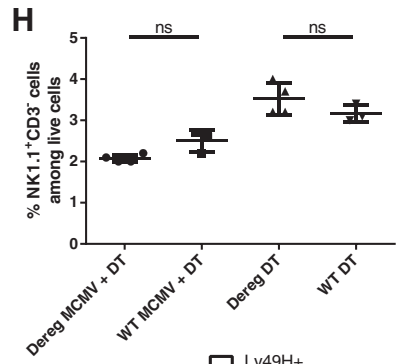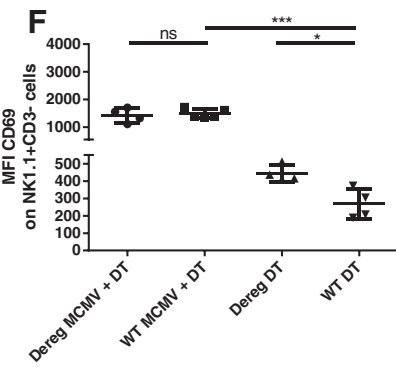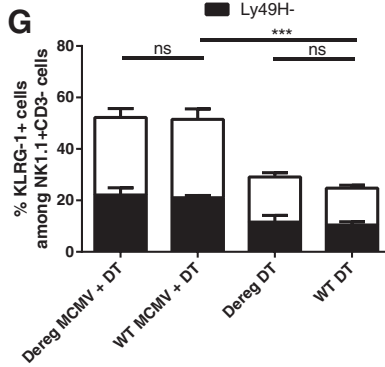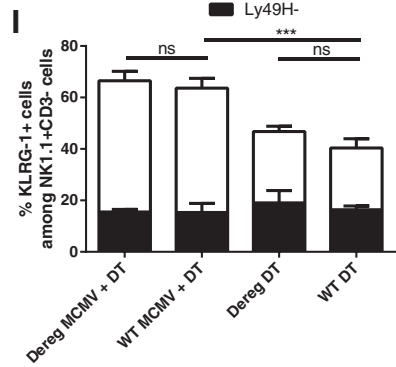

Supplement: MOESM5 [file 9606814]
